# Supplementary material for: An observational study of the lung clearance index throughout childhood in cystic fibrosis: early years matter
Source: PubMed Central journal article supplement (PMC7527650; doi:10.1183/13993003.00006-2020), 2020-10-01
Supplement: ERJ-00006-2020.Shareable.pdf [file ERJ-00006-2020.Shareable.pdf]

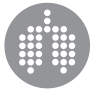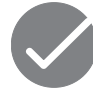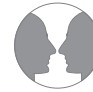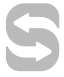

SHAREABLE PDF

# An observational study of the lung clearance index throughout childhood in cystic fibrosis: early years matter

Gwyneth Davies <sup>1,2,9</sup>, Sanja Stanojevic<sup>3,9</sup>, Emma Raywood <sup>1</sup>, Julie A. Duncan<sup>1</sup>, Janet Stocks<sup>1</sup>, Sooky Lum<sup>1</sup>, Andrew Bush<sup>4</sup>, Laura Viviani<sup>1</sup>, Angie Wade<sup>5</sup>, Alistair Calder<sup>6</sup>, Catherine M. Owens<sup>6</sup>, Christophe Goubau<sup>1</sup>, Siobhán B. Carr <sup>4</sup>, Cara J. Bossley<sup>7</sup>, Caroline Pao<sup>8</sup> and Paul Aurora<sup>1,2</sup> on behalf of the London Cystic Fibrosis Collaboration

**Affiliations:** <sup>1</sup>Infection, Immunity and Inflammation Research and Teaching Dept, UCL Great Ormond Street Institute of Child Health (UCL GOS ICH), London, UK. <sup>2</sup>Dept of Respiratory Medicine, Great Ormond Street Hospital for Children NHS Foundation Trust, London, UK. <sup>3</sup>Translational Medicine, SickKids Research Institute, Toronto, ON, Canada. <sup>4</sup>Dept of Paediatric Respiratory Medicine, Imperial College and Royal Brompton and Harefield Hospital NHS Foundation Trust, London, UK. <sup>5</sup>Clinical Epidemiology, Nutrition and Biostatistics Section, UCL GOS ICH, London, UK. <sup>6</sup>Dept of Radiology, Great Ormond Street Hospital for Children NHS Foundation Trust, London, UK. <sup>7</sup>Dept of Paediatric Respiratory Medicine, Kings College Hospital, London, UK. <sup>8</sup>Dept of Paediatric Respiratory Medicine, Royal London Hospital, London, UK. <sup>9</sup>Joint first authors.

**Correspondence:** Gwyneth Davies, Infection, Immunity and Inflammation Research and Teaching Dept, UCL Great Ormond Street Institute of Child Health, 30 Guilford Street, London WC1N 1EH, UK. E-mail: gwyneth.davies@ucl.ac.uk.

@ERSpublications

**Lung clearance index (LCI) in the early years was associated with LCI during adolescence in children with cystic fibrosis. Pre-school LCI may help to identify children in whom treatment could be intensified.** <https://bit.ly/2yKyMbM>

**Cite this article as:** Davies G, Stanojevic S, Raywood E, *et al.* An observational study of the lung clearance index throughout childhood in cystic fibrosis: early years matter. *Eur Respir J* 2020; 56: 2000006 [https://doi.org/10.1183/13993003.00006-2020].

This single-page version can be shared freely online.

*To the Editor:*

The London Cystic Fibrosis Collaboration (LCFC) has prospectively followed a clinically diagnosed cohort of infants with cystic fibrosis (CF) born in South East England since 1999 [1–4]. Over the past 20 years, the LCFC has obtained comprehensive measures of lung function and structure, including measures of ventilation inhomogeneity (lung clearance index (LCI)) and high-resolution computed tomography (HRCT) scans. By pre-school age, 73% of this cohort had LCI above the limits of normal, compared with 7% with abnormal forced expiratory volume in 0.5 seconds (FEV<sub>0.5</sub>) [1]. Children with elevated LCI during pre-school years also had worse lung function at early school age [2]. The aim of this study was to investigate how LCI changes across childhood to better understand to what extent LCI results at pre-school age are an indicator of lung disease severity in adolescence.
